1 An integrated genomic analysis of anaplastic meningioma identifies prognostic molecular  
2 signatures

3

4 Grace Collord<sup>1,2,20</sup>, Patrick Tarpey<sup>1,20</sup>, Natalja Kurbatova<sup>3</sup>, Inigo Martincorena<sup>1</sup>, Sebastian  
5 Moran<sup>4</sup>, Manuel Castro<sup>4</sup>, Tibor Nagy<sup>1</sup>, Graham Bignell<sup>1</sup>, Francesco Maura<sup>1,5,6</sup>, Jorge  
6 Berna<sup>7</sup>, Jose M. Tubio<sup>7</sup>, Chris E. McMurrans<sup>8</sup>, Adam M.H. Young<sup>8</sup>, Matthew D. Young<sup>1</sup>,  
7 Imran Noorani<sup>1,8</sup>, Stephen J Price<sup>8</sup>, Colin Watts<sup>8</sup>, Elke Leinritz<sup>9</sup>, Matthias Kirsch<sup>9</sup>,  
8 Gabriele Schackert<sup>9</sup>, Danita Pearson<sup>10</sup>, Abel Devadas<sup>10</sup>, Zvi Ram<sup>16</sup>, V. Peter Collins<sup>10</sup>,  
9 Kieren Allinson<sup>10</sup>, Michael D. Jenkinson<sup>11,19</sup>, Rasheed Zakaria<sup>11,12</sup>, Khaja Syed<sup>11,12</sup>, C.  
10 Oliver Hanemann<sup>13</sup>, Jemma Dunn<sup>13</sup>, Michael W. McDermott<sup>14</sup>, Ramez W Kirillos<sup>8</sup>,  
11 George S. Vassiliou<sup>1,15</sup>, Manel Esteller<sup>4,17,18</sup>, Sam Behjati<sup>1,2</sup>, Alvis Brazma<sup>3</sup>, Thomas  
12 Santarius<sup>8\*</sup>, Ultan McDermott<sup>1\*</sup>

13

14 **Affiliations:**

15 <sup>1</sup> Wellcome Trust Sanger Institute, Wellcome Genome Campus, Hinxton, CB10 1SA, UK

16 <sup>2</sup> Department of Paediatrics, University of Cambridge, Cambridge Biomedical Campus,  
17 CB2 0QQ, UK

18 <sup>3</sup> European Molecular Biology Laboratory, European Bioinformatics Institute, EMBL-EBI,  
19 Wellcome Trust Genome Campus, Hinxton, CB10 1SD, UK

20 <sup>4</sup> Cancer Epigenetics and Biology Program (PEBC), Bellvitge Biomedical Research  
21 Institute (IDIBELL), L'Hospitalet de Llobregat, Barcelona, Catalonia, Spain

22 <sup>5</sup> Department of Oncology and Hemato-Oncology, University of Milan, Milan, Italy

23 <sup>6</sup> Department of Hematology, Fondazione IRCCS Istituto Nazionale dei Tumori, Milan,  
24 Italy

25 <sup>7</sup> Phylogenomics Lab, Edificio Torre CACTI, Campus Universitario, Universidad de Vigo,  
26 36310 Vigo, Spain

- 27 <sup>8</sup> Department of Neurosurgery, Department of Clinical Neuroscience, Cambridge  
28 University Hospitals NHS Foundation Trust, Cambridge, CB2 0QQ, UK
- 29 <sup>9</sup> Klinik und Poliklinik für Neurochirurgie, "Carl Gustav Carus" Universitätsklinikum,  
30 Technische Universität Dresden, Fetscherstrasse 74, 01307 Dresden, Germany
- 31 <sup>10</sup> Department of Pathology, Cambridge University Hospital, CB2 0QQ, Cambridge, UK
- 32 <sup>11</sup> Department of Neurosurgery, The Walton Centre, Liverpool, L9 7LJ, UK
- 33 <sup>12</sup> Institute of Integrative Biology, University of Liverpool, Liverpool, L9 7LJ, UK
- 34 <sup>13</sup> Institute of Translational and Stratified Medicine, Plymouth University Peninsula  
35 Schools of Medicine and Dentistry, Plymouth University, Plymouth, Devon PL4 8AA, UK
- 36 <sup>14</sup> Department of Neurosurgery, UCSF Medical Center, San Francisco, CA 94143-0112,  
37 USA
- 38 <sup>15</sup> Department of Haematology, Cambridge University Hospitals NHS Trust, Cambridge,  
39 CB2 0QQ, UK
- 40 <sup>16</sup> Department of Neurosurgery, Tel-Aviv Medical Center, Tel-Aviv, Israel
- 41 <sup>17</sup> Physiological Sciences Department, School of Medicine and Health Sciences,  
42 University of Barcelona (UB), Catalonia, Spain
- 43 <sup>18</sup> Institució Catalana de Recerca i Estudis Avançats (ICREA), Barcelona, Catalonia,  
44 Spain
- 45 <sup>19</sup> Institute of Translational Medicine, University of Liverpool, Liverpool, L9 7LJ, UK
- 46 <sup>20</sup> These authors contributed equally to this work.
- 47 \* Corresponding authors
- 48
- 49 Correspondence should be addressed to:
- 50 U.M. ([um1@sanger.ac.uk](mailto:um1@sanger.ac.uk)), T.S. ([ts381@cam.ac.uk](mailto:ts381@cam.ac.uk))

51

52

53 **Abstract**

54 Anaplastic meningioma is a rare and aggressive brain tumor characterised by intractable  
55 recurrences and dismal outcomes. Here, we present an integrated analysis of the whole  
56 genome, transcriptome and methylation profiles of primary and recurrent anaplastic  
57 meningioma. A key finding was the delineation of two distinct molecular subgroups that  
58 were associated with diametrically opposed survival outcomes. Relative to lower grade  
59 meningiomas, anaplastic tumors harbored frequent driver mutations in SWI/SNF complex  
60 genes, which were confined to the poor prognosis subgroup. Our analyses discern two  
61 biologically distinct variants of anaplastic meningioma with potential prognostic and  
62 therapeutic significance.

63

64 **Introduction**

65 Meningiomas arise from arachnoidal cells of the meninges and are classified as grade I  
66 (80% of cases), grade II (10-20%) or grade III (1-3%)<sup>1,2</sup>. Grade III meningiomas comprise  
67 papillary, rhabdoid and anaplastic histological subtypes, with anaplastic tumors  
68 accounting for the vast majority of grade III diagnoses<sup>2,3</sup>. Nearly half of anaplastic  
69 meningiomas represent progression of a previously resected lower grade tumor, whereas  
70 the remainder arise *de novo*<sup>2,4,5</sup>. Recurrence rates are 5-20% and 20-40%, respectively,  
71 for grade I and 2 tumors<sup>3,6</sup>. By contrast, the majority of anaplastic meningioma patients  
72 suffer from inexorable recurrences with progressively diminishing benefit from repeated  
73 surgery and radiotherapy and 5-year overall survival of 30-60%<sup>4,7</sup>.

74 A recent study of 775 grade I and grade 2 meningiomas identified five molecular  
75 subgroups defined by driver mutation profile<sup>8</sup>. In keeping with previous smaller studies,  
76 mutually exclusive mutations in *NF2* and *TRAF7* were the most frequent driver events,  
77 followed by mutations affecting key mediators of PI3K and Hedgehog signalling<sup>8,9</sup>.  
78 Recurrent hotspot mutations were also identified in the catalytic unit of RNA polymerase II

79 (*POLR2A*) in 6% of grade I tumors<sup>8</sup>. More recently, a study comparing benign versus *de*  
80 *novo* atypical (grade II) meningiomas found the latter to be significantly associated with  
81 *NF2* and *SMARCB1* mutations<sup>10</sup>. Atypical meningiomas were further defined by DNA and  
82 chromatin methylation patterns consistent with upregulated PRC2 activity, differentially  
83 methylated Homeobox domains and transcriptional dysregulation of pathways involved in  
84 proliferation and differentiation<sup>10</sup>.

85 Despite the high mortality rate of anaplastic meningiomas, efforts to identify therapeutic  
86 strategies have been hampered by a limited understanding of the molecular features of  
87 this aggressive subtype. Here, we present an analysis of the genomic, transcriptional and  
88 DNA methylation patterns defining anaplastic meningioma. Our results reveal two distinct  
89 molecular subgroups associated with dramatically different prognoses.

90

## 91 **Results**

### 92 **Overview of the genomic landscape of primary and recurrent anaplastic** 93 **meningioma**

94 We performed whole genome sequencing (WGS) on a discovery set of 19 anaplastic  
95 meningiomas resected at first presentation ('primary'). A subsequent validation cohort  
96 comprised 31 primary tumors characterised by targeted sequencing of 366 cancer genes.  
97 We integrated genomic findings with RNA sequencing and methylation array profiling in a  
98 subset of samples (Supplementary Table S1). Somatic copy number alterations and  
99 rearrangements were derived from whole genome sequencing reads, with RNA  
100 sequences providing corroborating evidence for gene fusions. Given the propensity of  
101 anaplastic meningioma to recur, we studied by whole genome sequencing 13 recurrences  
102 from 7 patients.

103 Excluding a hypermutated tumor (PD23359a, see Supplementary Discussion), the  
104 somatic point mutation burden of meningioma was low with a median of 28 somatic

105 coding mutations per tumor (range 11 to 71; mean sequencing coverage 66X) in 18  
106 tumors interrogated by WGS at first presentation ('primary') (Supplementary Figure S1).  
107 Mutational signatures analysis of substitutions identified in whole genome sequences  
108 revealed the age-related, ubiquitous processes 1 and 5 as the predominant source of  
109 substitutions (Supplementary Figure S2)<sup>11</sup>.

110 The rearrangement profile of anaplastic meningioma is relatively quiet, with a median of  
111 12 structural rearrangements (range 0–79) in the 18 primary tumor genomes  
112 (Supplementary Figure S3, Supplementary Table S3). Somatic retrotransposition events,  
113 a significant source of structural variants in over half of human cancers, were scarce  
114 (Supplementary Figure S4; Supplementary Table S4)<sup>12</sup>. Analysis of expressed gene  
115 fusions did not reveal any recurrent events involving putative cancer genes  
116 (Supplementary Table S5).

117 Recurrent large copy number changes were in keeping with known copy number trends in  
118 aggressive meningiomas, notably frequent deletions affecting chromosomes 1p, 6q, 14  
119 and 22q (Figure 1b, Supplementary Table S6)<sup>2,8,10,13</sup>.

120 The genomic landscape of recurrent tumors was largely static both with respect to driver  
121 mutations and structural variation. Driver mutations differed between primary and  
122 recurrent tumors for two of eleven patients with serial resections available. For seven sets  
123 of recurrent tumors studied by whole genome sequencing, only two demonstrated any  
124 discrepancies in large copy number variants (PD23344 and PD23346; Supplementary  
125 Figure S5). Similarly, matched primary and recurrent samples clustered closely together  
126 by PCA of transcriptome data, suggesting minimal phenotypic evolution (Supplementary  
127 Figure S6).

128

129

130

131 **Driver genes do not delineate subgroups of anaplastic meningioma**

132 Over 80% of low grade meningiomas segregate into 5 distinct subgroups based on driver  
133 mutation profile<sup>8,10</sup>. In anaplastic meningioma, however, we found a more uniform driver  
134 landscape dominated by deleterious mutations in *NF2* (Figure 1a). A key feature  
135 distinguishing anaplastic meningioma from its lower grade counterparts were driver  
136 events in genes of the SWI/SNF chromatin regulatory complex (Figure 1a). The most  
137 frequently mutated SWI/SNF component was *ARID1A*, which harbored at least one  
138 deleterious somatic change in 12% of our cohort of 50 primary tumors (Supplementary  
139 Table S1). *ARID1A* has not been implicated as a driver in grade I or grade II  
140 meningiomas<sup>8,10</sup>. Single variants in *SMARCB1*, *SMARCA4* and *PBRM1* were also  
141 detected in three tumors (Supplementary Figure S7). In total, 16% of anaplastic  
142 meningiomas contained a SWI/SNF gene mutation. By contrast, SWI/SNF genes are  
143 mutated in <5% of benign and atypical meningiomas<sup>8,10</sup>.

144 In the combined cohort of 50 primary tumors, we found at least one driver mutation in  
145 *NF2* in 70%, similar to the prevalence reported in atypical meningiomas and more than  
146 twice that found in grade I tumors<sup>8,10,14</sup>. Interestingly, there was no significant difference in  
147 *NF2* expression between *NF2* mutant and wild-type tumors (*p*-value 0.960;  
148 Supplementary Figure S8). We considered promoter hypermethylation as a source of  
149 *NF2* inactivation, but found no evidence of this (Supplementary Table S7). Thus, as  
150 observed in other cancer types, non-mutational mechanisms may contribute to *NF2* loss  
151 of function in a proportion of anaplastic meningiomas<sup>15-20</sup>.

152 Other driver genes commonly implicated in low grade tumors were not mutated, or very  
153 infrequently (Figure 1a). Furthermore, we did not observe an increased frequency of  
154 *TERT* promoter mutations, previously associated with progressive or high grade  
155 tumors<sup>21,22</sup>. Notably<sup>2,23,24</sup>, methylation analysis revealed *CDKN2A* and *PTEN* promoter  
156 hypermethylation in 17% and 11% of primary tumors, respectively (Figure 1a). We did not

157 find evidence of novel cancer genes in our cohort, applying established methods to  
158 search for enrichment of non-synonymous mutations (See Methods and Supplementary  
159 Methods). The full driver landscape of anaplastic meningioma, considering point  
160 mutations, structural variants with resulting copy number changes and promoter  
161 hypermethylation is presented in Supplementary Figure S7.

162

### 163 **Differential gene expression defines anaplastic meningioma subgroups with** 164 **prognostic and biological significance**

165 We performed messenger RNA (mRNA) sequencing of 31 anaplastic meningioma  
166 samples from a total of 28 patients (26 primary tumors and 5 recurrences). Gene  
167 expression variability within the cohort did not correlate with clinical parameters including  
168 prior radiotherapy, anatomical location or clinical presentation (*de novo* versus  
169 progressive tumor) (Supplementary Figure S6). However, multiple unsupervised  
170 hierarchical clustering methods and correlation measures consistently delineated two  
171 distinct clusters, hereafter referred to as C1 and C2 (Figure 2a-c). The clinical trajectories  
172 of patients in these clusters markedly diverged. We retrospectively sought follow-up  
173 survival data from the time of first surgery, which was available for 25 of the 28 patients  
174 included in the transcriptome analysis (12 patients in C1, 13 in C2; mean follow-up of  
175 1,403 days from surgery). We observed a significantly worse overall survival outcome in  
176 C1 compared to C2 ( $p < 0.0001$ , hazard ratio 17.0 (95% CI 5.2-56.0)) (Figure 2g;  
177 Supplementary Table S8). The subgroups were well balanced with respect to potential  
178 confounding features such as gender, age, radiotherapy and anatomical location  
179 (Supplementary Table S9). Paradoxically, a greater proportion of C2 patients had higher  
180 Simpson surgical resection scores (indicating more residual tumor after surgery),  
181 conventionally a negative prognostic indicator ( $P = 0.081$ , Fisher's exact test)<sup>4,6</sup>.

182

### 183 **Transcriptional programmes segregating anaplastic meningioma**

184 Nineteen hundred genes underpinned the differentiation of anaplastic meningioma into  
185 subgroups C1 and C2, which could be reduced to only 6 transcripts selected on the basis  
186 of PCA coefficient and differential expression analysis (see Methods; Supplementary  
187 Tables S10 and S11; Supplementary Figure S9). Pathway enrichment analysis was most  
188 significant for evidence of epithelial-mesenchymal transition (EMT) in the C1 tumors, with  
189 concordant loss of E-cadherin (*CDH1*) and upregulation of *CXCL14*, both prognostic  
190 biomarkers in diverse other cancers (Supplementary Table S12, Figure 2d-f)<sup>25-32</sup>. The C1  
191 and C2 tumors were further distinguished by significant dysregulation of proliferation,  
192 PRC2 activity and embryonic stem cell transcriptional programmes (Supplementary Table  
193 S13). Hox genes constituted a notable proportion of the transcripts distinguishing the two  
194 anaplastic meningioma subgroups, largely underpinning the significance of pathways  
195 involved in tissue morphogenesis. Furthermore, differentially methylated genes were also  
196 significantly enriched for Hox genes, with pathway analysis results corroborating the main  
197 biological themes emerging from transcriptome analysis (Supplementary Tables S14 and  
198 S15).

199

### 200 **Comparison of the anaplastic and benign meningioma transcriptome**

201 Previous studies investigating the relationship between meningioma WHO grade and  
202 gene expression profiles have included few anaplastic tumors<sup>33,34</sup>. We therefore extended  
203 our analysis to include published RNA sequences from 19 benign grade I meningiomas.  
204 External data was processed using our in-house pipeline with additional measures taken  
205 to minimise batch effects (see Methods and Supplementary Tables S16 and S17).  
206 Unsupervised hierarchical clustering and principal component analysis demonstrated  
207 clear tumor segregation by histological grade (Figure 3a,b).



208 Consistent with there being a coherent biological trend across histological grades and  
209 anaplastic meningioma subgroups, we noted significant overlap between genes  
210 differentially expressed between grades and between C1 and C2 tumors (hypergeometric  
211 distribution  $P = 5.084E-09$ ). In keeping with this finding, formal pathway analysis identified  
212 significant dysregulation of stemness, proliferation, EMT and PRC2 activity  
213 (Supplementary Tables S18 and S19). The most significantly dysregulated pathways also  
214 included TGF-beta, Wnt and integrin signalling, mediators of invasion and mesenchymal  
215 differentiation that are normally in part controlled by NF2 and other Hippo pathway  
216 members<sup>15,16,35-37</sup>. Yes-associated protein 1 (Yap1), a cornerstone of oncogenic Hippo  
217 signalling, is frequently overexpressed in cancer and synergises with Wnt signalling to  
218 induce EMT<sup>15,37-39</sup>. *YAP1* was upregulated in anaplastic tumors ( $\log_2$  fold change = 2.18,  
219 FDR = 0.0062) along with *MYL9* ( $\log_2$  fold change = 6.25, FDR = 3.76E-18), a key  
220 downstream effector essential for Yap1-mediated stromal reprogramming (Figure 3c)<sup>38</sup>.  
221 Additionally, the anaplastic tumors demonstrated further upregulation of major growth  
222 factor receptor and kinase circuits previously implicated in meningioma pathogenesis,  
223 notably epidermal growth factor receptor (EGFR), insulin-like growth factor (IGFR),  
224 vascular endothelial growth factor receptor (VEGFR) and mTOR complex 1 (mTORC1)  
225 kinase complex<sup>40-45</sup>.

226

## 227 Discussion

228 Meningiomas constitute a common, yet diverse tumor type with few therapeutic  
229 options<sup>1,7,8,10</sup>. Efforts to improve clinical outcomes have been hampered by limited  
230 understanding of the molecular determinants of aggressive disease. Here, we explored  
231 genomic, epigenetic and transcriptional features of anaplastic meningioma, the most  
232 lethal meningioma subtype<sup>4</sup>.

233

234 Frequent somatic changes in SWI/SNF complex genes, predominantly *ARID1A*,  
235 constitute the main genomic distinction between anaplastic and lower grade  
236 meningiomas<sup>8,10</sup>. SWI/SNF acts as a tumor suppressor in many cell types by  
237 antagonising the chromatin modifying Polycomb repressive complex 2 (PRC2)<sup>46-48</sup>.  
238 Deleterious SWI/SNF mutations unfetter PRC2 activity with profound consequences for  
239 primitive developmental pathways frequently co-opted during oncogenesis<sup>48,49</sup>. SWI/SNF  
240 inactivation is associated with a stem cell-like phenotype and poor outcomes in diverse  
241 cancer types<sup>50-54</sup>.

242

243 Although anaplastic tumors resist meaningful classification based on driver mutation  
244 patterns, unbiased transcriptional profiling revealed two biologically distinct subgroups  
245 with dramatically divergent survival outcomes. This finding is emblematic of the limitations  
246 of histopathological grading as a risk stratification system for meningioma<sup>1,3,4,13,55</sup>.  
247 Interestingly, all SWI/SNF mutations were exclusively identified in the poor prognosis (C1)  
248 subgroup ( $P = 0.016$ , Fisher's exact test). C1 tumors were further characterised by  
249 transcriptional signatures of PRC2 target activation, stemness, proliferation and  
250 mesenchymal differentiation. These findings were in part underpinned by differential  
251 expression of Hox genes. Acquisition of invasive capacity and stem cell traits are  
252 frequently co-ordinately dysregulated in cancer, often through subversion of Hox gene  
253 programmes integral to normal tissue morphogenesis<sup>56-58</sup>. Hox genes have a central role  
254 in orchestrating vertebrate development and act as highly context-dependent oncogenes  
255 and tumor suppressors in cancer<sup>57,59</sup>. Several of the most starkly upregulated Hox genes  
256 in the C1 tumors consistently function as oncogenes across a range of solid and  
257 haematological malignancies, including *HOTAIR*, *HOXB7*, *HOXA4*, *HOXA-AS2*,  
258 *HOXC11*, and *NKX2-2*<sup>57,60-70</sup>. Like many long non-coding RNAs (lncRNA), *HOTAIR* and  
259 *HOXA-AS2* modulate gene expression primarily by interacting directly with chromatin

260 remodelling complexes, exerting oncogenic activity by recruiting PRC2 to target  
261 genes<sup>60,62,69-73</sup>. *HOXA-AS2* has been shown to mediate transcriptional repression of the  
262 tumor suppressor gene *CDKN2A* (p16<sup>INK4A</sup>), loss of which is associated with poor  
263 meningioma survival<sup>23,24,60,69,70</sup>. Given the antagonistic relationship between the SWI/SNF  
264 and PRC2 chromatin regulators, deleterious SWI/SNF mutations and overexpression of  
265 lncRNAs known to mediate PRC2 activity emerge as potentially convergent mechanisms  
266 underpinning the differences between C1 and C2 tumors<sup>49</sup>.

267

268 In the context of recent studies of lower grade meningiomas, our findings raise the  
269 possibility that the balance between PRC2 and SWI/SNF activity may have broader  
270 relevance to meningioma pathogenesis. Compared to grade I tumors, atypical  
271 meningiomas are more likely to harbor *SMARCB1* mutations and large deletions  
272 encompassing chromosomes 1q, 6q and 14q. Notably, these genomic regions  
273 encompass *ARID1A* and several other SWI/SNF subunit genes. Both *SMARCB1*  
274 mutations and the aforementioned copy number changes were associated with  
275 epigenetic evidence of increased PRC2 activity, differential Homeobox domain  
276 methylation, and upregulation of proliferation and stemness programmes in the atypical  
277 tumors.

278

279 The extent to which SWI/SNF depletion plays a role in lower grade meningiomas may be  
280 therapeutically relevant. Diverse SWI/SNF mutated cancers exhibit dependence on both  
281 catalytic and non-catalytic functions of EZH2, a core subunit of PRC2<sup>74-76</sup>. Several EZH2  
282 inhibitors are in development with promising initial clinical results<sup>77</sup>. Other modulators of  
283 PRC2 activity, including HOTAIR, may also be relevant therapeutic targets<sup>78,79</sup>.  
284 Furthermore, growing recognition of the relationship between EMT and resistance to  
285 conventional and targeted anti-cancer agents has profound implications for rational

286 integration of treatment approaches<sup>80,81</sup>. Notably, EGFR inhibition has yielded  
287 disappointing response rates in meningioma<sup>41,82</sup>. A mesenchymal phenotype is strongly  
288 associated with resistance to EGFR inhibitors in lung and colorectal cancer<sup>80,81,83-85</sup>.  
289 Combining agents that abrogate EMT with other therapies is a promising strategy for  
290 addressing cell-autonomous and extrinsic determinants of disease progression and may  
291 warrant further investigation in meningioma<sup>80,86</sup>.

292

293 This study has revealed prognostically significant anaplastic meningioma subgroups and  
294 identified potentially actionable alternations in SWI/SNF genes and other therapeutically  
295 tractable targets. However, a substantially larger series of tumors, ideally nested in a  
296 prospective multicentre observational study, will be required to expand upon our main  
297 findings and explore mechanistic and therapeutic ramifications of meningioma diversity.

298

299 **Methods**

300 **Sample selection**

301 DNA was extracted from 70 anaplastic meningiomas; 51 samples at first resection  
302 ('primary') and 19 from subsequent recurrences. Matched normal DNA was derived from  
303 peripheral blood lymphocytes. Written informed consent was obtained for sample  
304 collection and DNA sequencing from all patients in accordance with the Declaration of  
305 Helsinki and protocols approved by the NREC/Health Research Authority (REC reference  
306 14/YH/0101) and Ethics Committee at University Hospital Carl Gustav Carus, Technische  
307 Universität Dresden, Germany (EK 323122008). Samples underwent independent  
308 specialist pathology review (V.P.C and K.A). DNA extracted from fresh-frozen material  
309 was submitted for whole genome sequencing whereas that derived from formalin-fixed  
310 paraffin-embedded (FFPE) material underwent deep targeted sequencing of 366 cancer  
311 genes.

312

313 One tumor sample PD23348 (and two subsequent recurrences) separated from the main  
314 study samples in a principal components analysis of transcriptomic data (Supplementary  
315 Figure S10). Analysis of WGS and RNA sequencing data identified an expressed gene  
316 fusion, *NAB2-STAT6*. This fusion is pathognomonic of meningeal hemangiopericytoma,  
317 now classified as a separate entity, solitary fibrous tumors<sup>87-89</sup>. We therefore excluded  
318 three samples from this tumor from further study. A second sample (PD23354a),  
319 diagnosed as an anaplastic meningioma with papillary features, was found to have a  
320 strong APOBEC mutational signature as well as an *EML4-ALK* gene fusion (exon 6  
321 *EML4*, exon 19 *ALK*) (Supplementary Figure S11)<sup>90</sup>. Therefore this sample was also  
322 removed as a likely metastasis from a primary lung adenocarcinoma. The hypermutator  
323 sample PD23359a underwent additional pathological review to confirm the diagnosis of

324 anaplastic meningioma (K.A., Department of Histopathology, Cambridge University  
325 Hospital, Cambridge, UK).

326

327 RNA was extracted from fresh-frozen material from 34 primary and recurrent tumors, 3 of  
328 which were from PD23348 and were subsequently excluded from final analyses  
329 (Supplementary Table S1).

330

331 **Whole genome sequencing** Short insert 500bp genomic libraries were constructed,  
332 flowcells prepared and sequencing clusters generated according to Illumina library  
333 protocols<sup>91</sup>. 108 base/100 base (genomic), or 75 base (transcriptomic) paired-end  
334 sequencing were performed on Illumina X10 genome analyzers in accordance with the  
335 Illumina Genome Analyzer operating manual. The average sequence coverage was  
336 65.8X for tumor samples and 33.8X for matched normal samples (Supplementary Table  
337 S1).

338

### 339 **Targeted genomic sequencing**

340 For targeted sequencing we used a custom cRNA bait set (Agilent) to enrich for all coding  
341 exons of 366 cancer genes (Supplementary Table S20). Short insert libraries (150bp)  
342 were prepared and sequenced on the Illumina HiSeq 2000 using 75 base paired-end  
343 sequencing as per Illumina protocol. The average sequence coverage was 469X for the  
344 tumor samples.

345

### 346 **RNA sequencing and data processing**

347 For transcriptome sequencing, 350bp poly-A selected RNA libraries were prepared on the  
348 Agilent Bravo platform using the Stranded mRNA library prep kit from KAPA Biosystems.  
349 Processing steps were unchanged from those specified in the KAPA manual except for

350 use of an in-house indexing set. Reads were mapped to the GRCh37 reference genome  
351 using STAR (v2.5.0c)<sup>92</sup>. Mean sequence coverage was 128X. Read counts per gene,  
352 based on the union of all exons from all possible transcripts, were then extracted BAM  
353 files using HTseq (v0.6.1)<sup>93</sup>. Transcripts Per kilobase per Million reads (TPM) were  
354 generated using an in-house python script  
355 ([https://github.com/TravisCG/Sl\\_scripts/blob/master/tpm.py](https://github.com/TravisCG/Sl_scripts/blob/master/tpm.py))<sup>92,93</sup>. We downloaded  
356 archived RNA sequencing FASTQ files for 19 grade I meningioma samples representing  
357 the major mutational groups (*NF2*/chr22 loss, *POLR2A*, *KLF4/TRAFF7*, *PI3K* mutant)  
358 (ArrayExpress: GSE85133)<sup>8</sup>. Reads were then processed using STAR and HTseq as  
359 described above. Cancer cell line (n=252) and triple-negative breast cancer (n = 100)  
360 RNA sequencing data was generated in-house by the aforementioned sequencing and  
361 bioinformatic pipeline.

362 Expressed gene fusions were sought using an in-house pipeline incorporating three  
363 algorithms: TopHat-Fusion (v2.1.0), STAR-Fusion (v0.1.1) and deFuse (v0.7.0)  
364 (<https://github.com/cancerit/cgpRna>)<sup>92,94,95</sup>. Fusions identified by one or two algorithms or  
365 also detected in the matched normal sample were flagged as likely artefacts. Fusions  
366 were further annotated according to whether they involved a kinase or known oncogene  
367 and whether they occurred near known fragile sites or rearrangement break points<sup>96</sup>  
368 (Supplementary Table S5).

369

### 370 **Differential gene expression and pathway enrichment analysis**

371 The DESeq2 R package was used for all differential gene expression analyses<sup>97,98</sup>.  
372 DESeq2 uses shrinkage estimation of dispersion for the sample-specific count  
373 normalization and subsequently applies a linear regression method to identify differentially  
374 expressed genes (DEGs)<sup>97,98</sup>.

375 Preliminary comparison of anaplastic and externally-generated grade I meningioma data  
376 revealed evidence of laboratory batch effects, which we mitigated with two  
377 batch-correction methods: RUVg and PEER<sup>99,100</sup>. RUVg estimates the factor attributed to  
378 spurious variation using control genes that are assumed to have constant expression  
379 across samples<sup>101-103</sup>. We selected control genes (*RPL37A*, *EIF2B1*, *CASC3*, *IPO8*,  
380 *MRPL19*, *PGK1* and *POP4*) on the basis of previous studies of suitable control genes for  
381 transcript-based assays in meningioma<sup>104</sup>. PEER ('probabilistic estimation of expression  
382 residuals') is based on factor analysis methods that infer broad variance components in  
383 the measurements. PEER can find hidden factors that are orthogonal to the known  
384 covariates. We applied this feature of PEER to remove additional hidden effect biases.  
385 The final fitted linear regression model consists of the factor identified by RUVg method  
386 that represents the unwanted laboratory batch effect and 13 additional hidden factors  
387 found by PEER that are orthogonal to the estimated laboratory batch effect. Using this  
388 approach we were able to reduce the number of DEGs from more than 18000 to 8930, of  
389 which <4,000 are predicted to be protein-coding.

390 To identify biological pathways differentially expressed between meningioma grades and  
391 anaplastic meningioma subgroups we applied a functional class scoring algorithm using a  
392 collection of 461 published gene sets mapped to 10 canonical cancer hallmarks  
393 (Supplementary Table S21)<sup>56,105-109</sup>. We further corroborated these findings with a more  
394 general Gene Ontology (GO) pathway analysis<sup>110</sup>.

395

### 396 **Identification of 6 transcripts recapitulating anaplastic meningioma clusters**

397 Mapped RNA sequencing reads were normalised using the regularised logarithm (rlog)  
398 function implemented by the DESeq2 package<sup>97,98</sup>. PCA was performed using the top 500  
399 most variably expressed transcripts and the prcomp function (R stats package)<sup>111</sup>. Given  
400 that primary component 1 (PC1) was the vector most clearly distinguishing the closely



401 clustered C2 subgroup from the more diffusely clustered C1 (Figure 3a), we extracted the  
402 top 50 transcripts with the highest absolute PC1 coefficients. We then identified the subset  
403 that overlapped with the most significantly differentially expressed genes (absolute log<sub>2</sub>  
404 fold change > 4 and adjust *p*-value < 0.0001) between i) the C1 and C2 anaplastic  
405 meningioma subgroups and ii) the C1 anaplastic meningiomas and the 19 grade I tumors  
406 (Supplementary Tables S10 and S17). Iteratively reducing the number of PC1  
407 components identified the minimum number of transcripts that recapitulated segregation  
408 of C1 and C2 tumors upon unsupervised hierarchical clustering and PCA (Supplementary  
409 Table S11; Supplementary Figure S9).

410

#### 411 **Processing of genomic sequencing data**

412 Genomic reads were aligned to the reference human genome (GRCh37) using the  
413 Burrows-Wheeler Aligner, BWA (v0.5.9)<sup>112</sup>. CaVEMan (Cancer Variants Through  
414 Expectation Maximization: <http://cancerit.github.io/CaVEMan/>) was used for calling  
415 somatic substitutions. Small insertions and deletions (indels) in tumor and normal reads  
416 were called using a modified Pindel version 2.0. (<http://cancerit.github.io/cgpPindel/>) on  
417 the NCBI37 genome build<sup>113,114</sup>. Annotation was according to ENSEMBL version 58.  
418 Structural variants were called using a bespoke algorithm, BRASS (BReakpoint  
419 AnalySiS) (<https://github.com/cancerit/BRASS>) as previously described<sup>115</sup>.

420 The ascatNGS algorithm was used to estimate tumor purity and ploidy and to construct  
421 copy number profiles from whole genome data<sup>116</sup>.

422

#### 423 **Identification of cancer genes based on the impact of coding mutations**

424 To identify recurrently mutated driver genes, we applied a dN/dS method that considers  
425 the mutation spectrum, the sequence of each gene, the impact of coding substitutions  
426 (synonymous, missense, nonsense, splice site) and the variation of the mutation rate

427 across genes<sup>115</sup>. To detect genes under significant selective pressure by either point  
428 mutations or indels, each gene's *P*-values from dN/dS analysis of substitutions and from  
429 the recurrence analysis of indels were combined using Fisher's method. Multiple testing  
430 correction (Benjamini-Hochberg FDR) was performed separately for all genes, stratifying  
431 the FDR correction to increase sensitivity<sup>117</sup>. To achieve a low false discovery rate a  
432 conservative *q*-value cutoff of <0.05 was used for significance and considered significant  
433 any gene with  $q_{\text{mis\_sfdr}} < 0.05$  OR  $q_{\text{global\_sfdr}} < 0.05$ . See Supplementary Methods.

434

### 435 **Identification of driver mutations in known cancer genes**

436 Non-synonymous coding variants detected by Caveman and Pindel algorithms were  
437 flagged as putative driver mutations according to set criteria and further curated following  
438 manual inspection in the Jbrowse genome browser<sup>118</sup>. Variants were screened against  
439 lists of somatic mutations identified by a recent study of 11,119 human tumors  
440 encompassing 41 cancer types and also against a database of validated somatic drivers  
441 identified in cancer sequencing studies at the Wellcome Trust Sanger Institute  
442 (Supplementary Tables S22 and S23)<sup>119</sup>.

443 Copy number data was analysed for homozygous deletions encompassing tumor  
444 suppressor genes and for oncogene amplifications exceeding 5 or 9 copies for diploid  
445 and tetraploid genomes, respectively. Only focal (<1Mb) copy number variants meeting  
446 these criteria were considered potential drivers. Additional truncating events (disruptive  
447 rearrangement break points, nonsense point mutations, essential splice site mutations  
448 and out of frame indels) in established tumor suppressors were also flagged as potential  
449 drivers. Only rearrangements with breakpoints able to be reassembled at base pair  
450 resolution are included in this dataset.

451

452

### 453 **TraFiC pipeline for retrotransposon integration detection**

454 For the identification of putative solo-L1 and L1-transduction integration sites, we used  
455 the TraFiC (Transposome Finder in Cancer) algorithm<sup>12</sup>. TraFiC uses paired-end  
456 sequencing data for the detection of somatic insertions of transposable elements (TEs)  
457 and exogenous viruses. The identification of somatic TEs (solo-L1, Alu, SINE, and ERV)  
458 is performed in three steps: (i) selection of candidate reads, (ii) transposable element  
459 masking, (iii) clustering and prediction of TE integration sites and (iv) filtering of germline  
460 events<sup>12</sup>.

461

### 462 **Methylation arrays and analysis**

463 We performed quantitative methylation analysis of 850,000 CpG sites in 25 anaplastic  
464 meningiomas. Bisulfite-converted DNA (bs-DNA) was hybridized on the Illumina Infinium  
465 HumanMethylationEPIC BeadChip array following the manufacturer's instructions. All  
466 patient DNA samples were assessed for integrity, quantity and purity by electrophoresis in  
467 a 1.3% agarose gel, picogreen quantification and Nanodrop measurements. Bisulfite  
468 conversion of 500 ng of genomic DNA was done using the EZ DNA Methylation Kit (Zymo  
469 Research), following the manufacturer's instructions. Resulting raw intensity data (IDATs)  
470 were normalized under R statistical environment using the Illumina normalization method  
471 developed under the minfi package (v1.19.10). Normalized intensities were then used to  
472 calculate DNA methylation levels (beta values). Then, we excluded from the analysis the  
473 positions with background signal levels in methylated and unmethylated channels  
474 ( $p > 0.01$ ). Finally we removed probes with one or more single nucleotide polymorphisms  
475 (SNPs) with a minor allele frequency (MAF)  $> 1\%$  in the first 10 bp of the interrogated  
476 CpG, as well as the probes related to X and Y chromosomes. From the filtered positions,  
477 we selected only CpG sites present both in promoter regions (TSS, 5'UTR and 1st exon)  
478 and CpG islands (UCSC database, genome version hg19).

479 For the supervised analysis of the probes, CpG sites were selected by applying an  
480 ANOVA test to identify statistically significant CpG positions (FDR adjusted p-value <  
481 0.01) that were differentially methylated among the compared groups ( $\Delta\beta > 0.2$ ). Selected  
482 CpG sites were later clustered based on the Manhattan distances aggregated by ward's  
483 linkage. Finally, the genes corresponding to the selected CpGs were used to perform a  
484 Gene Set Enrichment Analysis (GSEA) with curated gene sets in the Molecular  
485 Signatures Database<sup>120</sup>. The gene sets used were: H: hallmark gene sets, BP: GO  
486 biological process, CC: GO cellular component, MF: GO molecular function and C3: motif  
487 gene sets (<http://software.broadinstitute.org/gsea/msigdb/collections.jsp>). The gene  
488 clusters resulting from the hypergeometric test with a FDR adjusted p-value < 0.05 were  
489 finally considered. We observed high levels of methylation for *CREBBP* in the majority of  
490 tumor samples, however, similar patterns were manifest in normal tissue controls, hence  
491 *CREBBP* hypermethylation does not appear to be a feature of oncogenesis in these  
492 samples.

493

#### 494 **Mutational signature analysis**

495 Mutational signature extraction was performed using the nonnegative matrix factorization  
496 (NNMF) algorithm<sup>11</sup>. Briefly, the algorithm identifies a minimal set of mutational signatures  
497 that optimally explains the proportions of mutation types found across a given mutational  
498 catalogue and then estimates the contribution of each identified signature to the mutation  
499 spectra of each sample.

500

#### 501 **Patient survival analysis**

502 The Kaplan-Meier method was used to analyze survival outcomes by the log-rank  
503 Mantel-Cox test, with hazard ratio and two-sided 95% confidence intervals calculated  
504 using the Mantel-Haenszel test (GraphPad Prism, ver 7.02). Overall survival data from

505 time of first surgery for each anaplastic meningioma within gene-expression defined  
506 subgroups 1 and 2 was collected and used to plot a Kaplan-Meier survival curve.

507

#### 508 **Data availability**

509 All sequencing data that support the findings of this study have been deposited in the  
510 European Genome-Phenome Archive and are accessible through the accession numbers  
511 EGAS00001000377, EGAS00001000828, EGAS00001000859, EGAS00001001155 and  
512 EGAS00001001873. All other relevant data are available from the corresponding author  
513 on request.

514

#### 515 **Supplementary Discussion**

##### 516 **A hypermutator anaplastic meningioma with a haploid genome**

517 One primary anaplastic meningioma resected from an 85-year old female (PD23359a)  
518 had a hypermutator phenotype, with 27,332 point mutations and LOH across nearly its  
519 entire genome (Supplementary Figure S12; Supplementary Table S24). Independent  
520 pathological review confirmed the original diagnosis of anaplastic meningioma, and  
521 transcriptome analysis confirmed that this tumor clustered appropriately with the rest of  
522 the cohort (Figure 3a,b). The majority of the mutations were substitutions, 72% of which  
523 were C>T transitions. We identified two deleterious mutations in DNA damage repair  
524 mediators: a *TP53* p.R248Q missense mutation and a homozygous truncating variant in  
525 the mismatch repair gene *MSH6* (p.L1330Vfs\*9). Despite the latter finding, mutational  
526 signatures analysis was dominated by signature 1, with no evidence of signatures  
527 typically associated with defects in homologous recombination, mismatch repair or *POLE*  
528 activity (signatures 3, 6, 10, 15, 20 or 26). The copy number profile is most consistent with  
529 this tumor having first undergone haploidization of its genome, with the exception of  
530 chromosomes 7, 19 and 20, followed by whole genome duplication (Supplementary

531 Figure S12). Of note, several important oncogenes are located on chromosome 7,  
532 including *EGFR*, *MET* and *BRAF*. Widespread LOH has been described in a significant  
533 proportion of oncocytic follicular thyroid cancers where preservation of chromosome 7  
534 heterozygosity has also been observed<sup>121</sup>.

535

536

537

538 **References**

- 539 1 Louis, D. N. *et al.* The 2016 World Health Organization Classification of Tumors of the Central  
540 Nervous System: a summary. *Acta Neuropathol* **131**, 803-820, doi:10.1007/s00401-016-1545-1  
541 (2016).
- 542 2 Mawrin, C. & Perry, A. Pathological classification and molecular genetics of meningiomas. *J*  
543 *Neurooncol* **99**, 379-391, doi:10.1007/s11060-010-0342-2 (2010).
- 544 3 Rogers, C. L. *et al.* Pathology concordance levels for meningioma classification and grading in  
545 NRG Oncology RTOG Trial 0539. *Neuro Oncol* **18**, 565-574, doi:10.1093/neuonc/nov247 (2016).
- 546 4 Champeaux, C., Wilson, E., Brandner, S., Shieff, C. & Thorne, L. World Health Organization  
547 grade III meningiomas. A retrospective study for outcome and prognostic factors assessment. *Br J*  
548 *Neurosurg* **29**, 693-698, doi:10.3109/02688697.2015.1054350 (2015).
- 549 5 Moliterno, J. *et al.* Survival in patients treated for anaplastic meningioma. *Journal of neurosurgery*  
550 **123**, 23-30, doi:10.3171/2014.10.JNS14502 (2015).
- 551 6 Durand, A. *et al.* WHO grade II and III meningiomas: a study of prognostic factors. *J Neurooncol*  
552 **95**, 367-375, doi:10.1007/s11060-009-9934-0 (2009).
- 553 7 Buttrick, S., Shah, A. H., Komotar, R. J. & Ivan, M. E. Management of Atypical and Anaplastic  
554 Meningiomas. *Neurosurg Clin N Am* **27**, 239-247, doi:10.1016/j.nec.2015.11.003 (2016).
- 555 8 Clark, V. E. *et al.* Recurrent somatic mutations in POLR2A define a distinct subset of  
556 meningiomas. *Nat Genet* **48**, 1253-1259, doi:10.1038/ng.3651 (2016).
- 557 9 Clark, V. E. *et al.* Genomic analysis of non-NF2 meningiomas reveals mutations in TRAF7, KLF4,  
558 AKT1, and SMO. *Science* **339**, 1077-1080, doi:10.1126/science.1233009 (2013).
- 559 10 Harmanci, A. S. *et al.* Integrated genomic analyses of de novo pathways underlying atypical  
560 meningiomas. *Nature communications* **8**, 14433, doi:10.1038/ncomms14433 (2017).
- 561 11 Alexandrov, L. B. *et al.* Signatures of mutational processes in human cancer. *Nature* **500**, 415-421,  
562 doi:10.1038/nature12477 (2013).
- 563 12 Tubio, J. M. *et al.* Mobile DNA in cancer. Extensive transduction of nonrepetitive DNA mediated  
564 by L1 retrotransposition in cancer genomes. *Science* **345**, 1251343, doi:10.1126/science.1251343  
565 (2014).
- 566 13 Sahn, F. *et al.* DNA methylation-based classification and grading system for meningioma: a  
567 multicentre, retrospective analysis. *Lancet Oncol*, doi:10.1016/S1470-2045(17)30155-9 (2017).
- 568 14 Forbes, S. A. *et al.* COSMIC: somatic cancer genetics at high-resolution. *Nucleic acids research*  
569 **45**, D777-d783, doi:10.1093/nar/gkw1121 (2017).
- 570 15 Harvey, K. F., Zhang, X. & Thomas, D. M. The Hippo pathway and human cancer. *Nat Rev*  
571 *Cancer* **13**, 246-257, (2013).
- 572 16 McClatchey, A. I. Merlin and ERM proteins: unappreciated roles in cancer development? *Nat Rev*  
573 *Cancer* **3**, 877-883 (2003).
- 574 17 Petrilli, A. M. & Fernandez-Valle, C. Role of Merlin/NF2 inactivation in tumor biology. *Oncogene*  
575 **35**, 537-548, doi:10.1038/onc.2015.125 (2016).
- 576 18 Morales, F. C., Molina, J. R., Hayashi, Y. & Georgescu, M. M. Overexpression of ezrin inactivates  
577 NF2 tumor suppressor in glioblastoma. *Neuro Oncol* **12**, 528-539, doi:10.1093/neuonc/nop060  
578 (2010).
- 579 19 Shaw, R. J. *et al.* The Nf2 tumor suppressor, merlin, functions in Rac-dependent signaling. *Dev*  
580 *Cell* **1**, 63-72 (2001).
- 581 20 Xiao, G. H., Beeser, A., Chernoff, J. & Testa, J. R. p21-activated kinase links Rac/Cdc42 signaling  
582 to merlin. *J Biol Chem* **277**, 883-886, doi:10.1074/jbc.C100553200 (2002).
- 583 21 Goutagny, S. *et al.* High incidence of activating TERT promoter mutations in meningiomas  
584 undergoing malignant progression. *Brain Pathol* **24**, 184-189, doi:10.1111/bpa.12110 (2014).
- 585 22 Koelsche, C. *et al.* Distribution of TERT promoter mutations in pediatric and adult tumors of the  
586 nervous system. *Acta Neuropathol* **126**, 907-915, doi:10.1007/s00401-013-1195-5 (2013).
- 587 23 Bostrom, J. *et al.* Alterations of the tumor suppressor genes CDKN2A (p16(INK4a)), p14(ARF),  
588 CDKN2B (p15(INK4b)), and CDKN2C (p18(INK4c)) in atypical and anaplastic meningiomas.  
589 *Am J Pathol* **159**, 661-669, doi:10.1016/S0002-9440(10)61737-3 (2001).
- 590 24 Goutagny, S. *et al.* Genomic profiling reveals alternative genetic pathways of meningioma  
591 malignant progression dependent on the underlying NF2 status. *Clin Cancer Res* **16**, 4155-4164,  
592 doi:10.1158/1078-0432.CCR-10-0891 (2010).



- 593 25 Paredes, J. *et al.* Epithelial E- and P-cadherins: role and clinical significance in cancer. *Biochimica*  
594 *et biophysica acta* **1826**, 297-311, doi:10.1016/j.bbcan.2012.05.002 (2012).
- 595 26 Berx, G. & van Roy, F. Involvement of members of the cadherin superfamily in cancer. *Cold*  
596 *Spring Harbor perspectives in biology* **1**, a003129, doi:10.1101/cshperspect.a003129 (2009).
- 597 27 Alexiadis, M. *et al.* Transcriptomic analysis of stage 1 versus advanced adult granulosa cell  
598 tumors. *Oncotarget* **7**, 14207-14219, doi:10.18632/oncotarget.7422 (2016).
- 599 28 Augsten, M. *et al.* Cancer-associated fibroblasts expressing CXCL14 rely upon NOS1-derived  
600 nitric oxide signaling for their tumor-supporting properties. *Cancer Res* **74**, 2999-3010,  
601 doi:10.1158/0008-5472.can-13-2740 (2014).
- 602 29 Sjoberg, E., Augsten, M., Bergh, J., Jirstrom, K. & Ostman, A. Expression of the chemokine  
603 CXCL14 in the tumour stroma is an independent marker of survival in breast cancer. *Br J Cancer*  
604 **114**, 1117-1124, doi:10.1038/bjc.2016.104 (2016).
- 605 30 Zakrzewski, K. *et al.* Transcriptional profiles of pilocytic astrocytoma are related to their three  
606 different locations, but not to radiological tumor features. *BMC Cancer* **15**, 778,  
607 doi:10.1186/s12885-015-1810-z (2015).
- 608 31 Zeraati, M. *et al.* Cancer-associated noncoding mutations affect RNA G-quadruplex-mediated  
609 regulation of gene expression. *Sci Rep* **7**, 708, doi:10.1038/s41598-017-00739-y (2017).
- 610 32 Zhao, L. *et al.* Long Noncoding RNA LINC00092 Acts in Cancer-Associated Fibroblasts to Drive  
611 Glycolysis and Progression of Ovarian Cancer. *Cancer Res* **77**, 1369-1382,  
612 doi:10.1158/0008-5472.can-16-1615 (2017).
- 613 33 Watson, M. A. *et al.* Molecular characterization of human meningiomas by gene expression  
614 profiling using high-density oligonucleotide microarrays. *The American journal of pathology* **161**,  
615 665-672, doi:10.1016/s0002-9440(10)64222-8 (2002).
- 616 34 Wrobel, G. *et al.* Microarray-based gene expression profiling of benign, atypical and anaplastic  
617 meningiomas identifies novel genes associated with meningioma progression. *Int J Cancer* **114**,  
618 249-256, doi:10.1002/ijc.20733 (2005).
- 619 35 De Craene, B. & Berx, G. Regulatory networks defining EMT during cancer initiation and  
620 progression. *Nature reviews. Cancer* **13**, 97-110, doi:10.1038/nrc3447 (2013).
- 621 36 Morrow, K. A. *et al.* Loss of tumor suppressor Merlin results in aberrant activation of  
622 Wnt/beta-catenin signaling in cancer. *Oncotarget* **7**, 17991-18005, doi:10.18632/oncotarget.7494  
623 (2016).
- 624 37 Kalluri, R. The biology and function of fibroblasts in cancer. *Nat Rev Cancer* **16**, 582-598,  
625 doi:10.1038/nrc.2016.73 (2016).
- 626 38 Calvo, F. *et al.* Mechanotransduction and YAP-dependent matrix remodelling is required for the  
627 generation and maintenance of cancer-associated fibroblasts. *Nat Cell Biol* **15**, 637-646,  
628 doi:10.1038/ncb2756 (2013).
- 629 39 Rosenbluh, J. *et al.* beta-Catenin-driven cancers require a YAP1 transcriptional complex for  
630 survival and tumorigenesis. *Cell* **151**, 1457-1473, doi:10.1016/j.cell.2012.11.026 (2012).
- 631 40 Mawrin, C. *et al.* Different activation of mitogen-activated protein kinase and Akt signaling is  
632 associated with aggressive phenotype of human meningiomas. *Clin Cancer Res* **11**, 4074-4082,  
633 doi:10.1158/1078-0432.ccr-04-2550 (2005).
- 634 41 Mawrin, C., Chung, C. & Preusser, M. Biology and clinical management challenges in  
635 meningioma. *American Society of Clinical Oncology educational book. American Society of*  
636 *Clinical Oncology. Meeting*, e106-115, doi:10.14694/EdBook\_AM.2015.35.e106 (2015).
- 637 42 Lopez-Lago, M. A., Okada, T., Murillo, M. M., Socci, N. & Giancotti, F. G. Loss of the tumor  
638 suppressor gene NF2, encoding merlin, constitutively activates integrin-dependent mTORC1  
639 signaling. *Mol Cell Biol* **29**, 4235-4249, doi:10.1128/mcb.01578-08 (2009).
- 640 43 James, M. F. *et al.* NF2/merlin is a novel negative regulator of mTOR complex 1, and activation of  
641 mTORC1 is associated with meningioma and schwannoma growth. *Molecular and cellular*  
642 *biology* **29**, 4250-4261, doi:10.1128/mcb.01581-08 (2009).
- 643 44 Johnson, M. D., Okedli, E., Woodard, A., Toms, S. A. & Allen, G. S. Evidence for  
644 phosphatidylinositol 3-kinase-Akt-p7S6K pathway activation and transduction of mitogenic  
645 signals by platelet-derived growth factor in meningioma cells. *Journal of neurosurgery* **97**,  
646 668-675, doi:10.3171/jns.2002.97.3.0668 (2002).
- 647 45 Weisman, A. S., Raguette, S. S. & Kelly, P. A. Characterization of the epidermal growth factor  
648 receptor in human meningioma. *Cancer Res* **47**, 2172-2176 (1987).



- 649 46 Wu, J. I., Lessard, J. & Crabtree, G. R. Understanding the words of chromatin regulation. *Cell* **136**,  
650 200-206, doi:10.1016/j.cell.2009.01.009 (2009).
- 651 47 Kia, S. K., Gorski, M. M., Giannakopoulos, S. & Verrijzer, C. P. SWI/SNF mediates polycomb  
652 eviction and epigenetic reprogramming of the INK4b-ARF-INK4a locus. *Mol Cell Biol* **28**,  
653 3457-3464, doi:10.1128/MCB.02019-07 (2008).
- 654 48 Wilson, B. G. & Roberts, C. W. SWI/SNF nucleosome remodellers and cancer. *Nat Rev Cancer* **11**,  
655 481-492, doi:10.1038/nrc3068 (2011).
- 656 49 Kadoch, C. & Crabtree, G. R. Mammalian SWI/SNF chromatin remodeling complexes and cancer:  
657 Mechanistic insights gained from human genomics. *Sci Adv* **1**, e1500447,  
658 doi:10.1126/sciadv.1500447 (2015).
- 659 50 Lichner, Z. *et al.* The chromatin remodeling gene ARID1A is a new prognostic marker in clear cell  
660 renal cell carcinoma. *Am J Pathol* **182**, 1163-1170, doi:10.1016/j.ajpath.2013.01.007 (2013).
- 661 51 Luchini, C. *et al.* Prognostic role and implications of mutation status of tumor suppressor gene  
662 ARID1A in cancer: a systematic review and meta-analysis. *Oncotarget* **6**, 39088-39097,  
663 doi:10.18632/oncotarget.5142 (2015).
- 664 52 Le Loarer, F. *et al.* SMARCA4 inactivation defines a group of undifferentiated thoracic  
665 malignancies transcriptionally related to BAF-deficient sarcomas. *Nat Genet* **47**, 1200-1205,  
666 doi:10.1038/ng.3399 (2015).
- 667 53 Farshidfar, F. *et al.* Integrative Genomic Analysis of Cholangiocarcinoma Identifies Distinct  
668 IDH-Mutant Molecular Profiles. *Cell reports* **18**, 2780-2794, doi:10.1016/j.celrep.2017.02.033  
669 (2017).
- 670 54 Liu, G. *et al.* Prognostic and Clinicopathological significance of ARID1A in endometrium-related  
671 gynecological cancers: A meta-analysis. *J Cell Biochem*, doi:10.1002/jcb.26109 (2017).
- 672 55 Goldbrunner, R. *et al.* EANO guidelines for the diagnosis and treatment of meningiomas. *Lancet*  
673 *Oncol* **17**, e383-391, doi:10.1016/S1470-2045(16)30321-7 (2016).
- 674 56 Hanahan, D. & Weinberg, R. A. Hallmarks of cancer: the next generation. *Cell* **144**, 646-674,  
675 doi:10.1016/j.cell.2011.02.013 (2011).
- 676 57 Shah, N. & Sukumar, S. The Hox genes and their roles in oncogenesis. *Nat Rev Cancer* **10**,  
677 361-371, doi:10.1038/nrc2826 (2010).
- 678 58 Xu, Q. *et al.* Long non-coding RNA regulation of epithelial-mesenchymal transition in cancer  
679 metastasis. *Cell Death Dis* **7**, e2254, doi:10.1038/cddis.2016.149 (2016).
- 680 59 Krumlauf, R. Hox genes in vertebrate development. *Cell* **78**, 191-201 (1994).
- 681 60 Xie, M. *et al.* Long noncoding RNA HOXA-AS2 promotes gastric cancer proliferation by  
682 epigenetically silencing P21/PLK3/DDIT3 expression. *Oncotarget* **6**, 33587-33601,  
683 doi:10.18632/oncotarget.5599 (2015).
- 684 61 Bao, X. *et al.* Knockdown of long non-coding RNA HOTAIR increases miR-454-3p by targeting  
685 Stat3 and Atg12 to inhibit chondrosarcoma growth. *Cell Death Dis* **8**, e2605,  
686 doi:10.1038/cddis.2017.31 (2017).
- 687 62 Gupta, R. A. *et al.* Long non-coding RNA HOTAIR reprograms chromatin state to promote cancer  
688 metastasis. *Nature* **464**, 1071-1076, doi:10.1038/nature08975 (2010).
- 689 63 Kim, K. *et al.* HOTAIR is a negative prognostic factor and exhibits pro-oncogenic activity in  
690 pancreatic cancer. *Oncogene* **32**, 1616-1625, (2013).
- 691 64 Li, X. *et al.* Long non-coding RNA HOTAIR, a driver of malignancy, predicts negative prognosis  
692 and exhibits oncogenic activity in oesophageal squamous cell carcinoma. *Br J Cancer* **109**,  
693 2266-2278, doi:10.1038/bjc.2013.548 (2013).
- 694 65 Ozes, A. R. *et al.* NF-kappaB-HOTAIR axis links DNA damage response, chemoresistance and  
695 cellular senescence in ovarian cancer. *Oncogene* **35**, 5350-5361, doi:10.1038/onc.2016.75 (2016).
- 696 66 Shi, J. *et al.* Long non-coding RNA in glioma: signaling pathways. *Oncotarget*,  
697 doi:10.18632/oncotarget.15175 (2017).
- 698 67 Wu, X. *et al.* HOXB7, a homeodomain protein, is overexpressed in breast cancer and confers  
699 epithelial-mesenchymal transition. *Cancer Res* **66**, 9527-9534,  
700 doi:10.1158/0008-5472.CAN-05-4470 (2006).
- 701 68 Hayashida, T. *et al.* HOXB9, a gene overexpressed in breast cancer, promotes tumorigenicity and  
702 lung metastasis. *Proc Natl Acad Sci U S A* **107**, 1100-1105, doi:10.1073/pnas.0912710107 (2010).

- 703 69 Ding, J. *et al.* Long noncoding RNA HOXA-AS2 represses P21 and KLF2 expression transcription  
704 by binding with EZH2, LSD1 in colorectal cancer. *Oncogenesis* **6**, e288,  
705 doi:10.1038/oncsis.2016.84 (2017).
- 706 70 Zhao, H., Zhang, X., Frazao, J. B., Condino-Neto, A. & Newburger, P. E. HOX antisense lincRNA  
707 HOXA-AS2 is an apoptosis repressor in all trans retinoic acid treated NB4 promyelocytic  
708 leukemia cells. *J Cell Biochem* **114**, 2375-2383, doi:10.1002/jcb.24586 (2013).
- 709 71 Ponting, C. P., Oliver, P. L. & Reik, W. Evolution and functions of long noncoding RNAs. *Cell*  
710 **136**, 629-641, doi:10.1016/j.cell.2009.02.006 (2009).
- 711 72 Rinn, J. L. *et al.* Functional demarcation of active and silent chromatin domains in human HOX  
712 loci by noncoding RNAs. *Cell* **129**, 1311-1323, doi:10.1016/j.cell.2007.05.022 (2007).
- 713 73 Khalil, A. M. *et al.* Many human large intergenic noncoding RNAs associate with  
714 chromatin-modifying complexes and affect gene expression. *Proceedings of the National Academy*  
715 *of Sciences of the United States of America* **106**, 11667-11672, doi:10.1073/pnas.0904715106  
716 (2009).
- 717 74 Helming, K. C., Wang, X. & Roberts, C. W. Vulnerabilities of mutant SWI/SNF complexes in  
718 cancer. *Cancer Cell* **26**, 309-317, doi:10.1016/j.ccr.2014.07.018 (2014).
- 719 75 Kim, K. H. *et al.* SWI/SNF-mutant cancers depend on catalytic and non-catalytic activity of  
720 EZH2. *Nat Med* **21**, 1491-1496, doi:10.1038/nm.3968 (2015).
- 721 76 Bitler, B. G. *et al.* Synthetic lethality by targeting EZH2 methyltransferase activity in  
722 ARID1A-mutated cancers. *Nat Med* **21**, 231-238, (2015).
- 723 77 Kim, K. H. & Roberts, C. W. Targeting EZH2 in cancer. *Nat Med* **22**, 128-134,  
724 doi:10.1038/nm.4036 (2016).
- 725 78 Ozes, A. R. *et al.* Therapeutic targeting using tumor specific peptides inhibits long non-coding  
726 RNA HOTAIR activity in ovarian and breast cancer. *Scientific reports* **7**, 894,  
727 doi:10.1038/s41598-017-00966-3 (2017).
- 728 79 Pfister, S. X. & Ashworth, A. Marked for death: targeting epigenetic changes in cancer. *Nature*  
729 *reviews. Drug discovery* **16**, 241-263, doi:10.1038/nrd.2016.256 (2017).
- 730 80 Gotwals, P. *et al.* Prospects for combining targeted and conventional cancer therapy with  
731 immunotherapy. *Nat Rev Cancer* advance online publication, doi:10.1038/nrc.2017.17 (2017).
- 732 81 Marcucci, F., Stassi, G. & De Maria, R. Epithelial-mesenchymal transition: a new target in  
733 anticancer drug discovery. *Nature reviews. Drug discovery* **15**, 311-325, doi:10.1038/nrd.2015.13  
734 (2016).
- 735 82 Norden, A. D. *et al.* Phase II trials of erlotinib or gefitinib in patients with recurrent meningioma. *J*  
736 *Neurooncol* **96**, 211-217, doi:10.1007/s11060-009-9948-7 (2010).
- 737 83 Byers, L. A. *et al.* An epithelial-mesenchymal transition gene signature predicts resistance to  
738 EGFR and PI3K inhibitors and identifies Axl as a therapeutic target for overcoming EGFR  
739 inhibitor resistance. *Clinical cancer research : an official journal of the American Association for*  
740 *Cancer Research* **19**, 279-290, doi:10.1158/1078-0432.ccr-12-1558 (2013).
- 741 84 Buonato, J. M. & Lazzara, M. J. ERK1/2 blockade prevents epithelial-mesenchymal transition in  
742 lung cancer cells and promotes their sensitivity to EGFR inhibition. *Cancer Res* **74**, 309-319,  
743 doi:10.1158/0008-5472.can-12-4721 (2014).
- 744 85 Thomson, S., Petti, F., Sujka-Kwok, I., Epstein, D. & Haley, J. D. Kinase switching in  
745 mesenchymal-like non-small cell lung cancer lines contributes to EGFR inhibitor resistance  
746 through pathway redundancy. *Clinical & experimental metastasis* **25**, 843-854,  
747 doi:10.1007/s10585-008-9200-4 (2008).
- 748 86 Marcucci, F., Stassi, G. & De Maria, R. Epithelial-mesenchymal transition: a new target in  
749 anticancer drug discovery. *Nat Rev Drug Discov* **15**, 311-325, doi:10.1038/nrd.2015.13 (2016).
- 750 87 Chmielecki, J. *et al.* Whole-exome sequencing identifies a recurrent NAB2-STAT6 fusion in  
751 solitary fibrous tumors. *Nat Genet* **45**, 131-132, doi:10.1038/ng.2522 (2013).
- 752 88 Gao, F. *et al.* Inversion-mediated gene fusions involving NAB2-STAT6 in an unusual malignant  
753 meningioma. *Br J Cancer* **109**, 1051-1055, doi:10.1038/bjc.2013.395 (2013).
- 754 89 Schweizer, L. *et al.* Meningeal hemangiopericytoma and solitary fibrous tumors carry the  
755 NAB2-STAT6 fusion and can be diagnosed by nuclear expression of STAT6 protein. *Acta*  
756 *Neuropathol* **125**, 651-658, doi:10.1007/s00401-013-1117-6 (2013).
- 757 90 Soda, M. *et al.* Identification of the transforming EML4-ALK fusion gene in non-small-cell lung  
758 cancer. *Nature* **448**, 561-566, doi:10.1038/nature05945 (2007).

- 759 91 Kozarewa, I. *et al.* Amplification-free Illumina sequencing-library preparation facilitates improved  
760 mapping and assembly of (G+C)-biased genomes. *Nature methods* **6**, 291-295,  
761 doi:10.1038/nmeth.1311 (2009).
- 762 92 Dobin, A. *et al.* STAR: ultrafast universal RNA-seq aligner. *Bioinformatics (Oxford, England)* **29**,  
763 15-21, doi:10.1093/bioinformatics/bts635 (2013).
- 764 93 Anders, S., Pyl, P. T. & Huber, W. HTSeq--a Python framework to work with high-throughput  
765 sequencing data. *Bioinformatics (Oxford, England)* **31**, 166-169,  
766 doi:10.1093/bioinformatics/btu638 (2015).
- 767 94 McPherson, A. *et al.* deFuse: an algorithm for gene fusion discovery in tumor RNA-Seq data.  
768 *PLoS computational biology* **7**, e1001138, doi:10.1371/journal.pcbi.1001138 (2011).
- 769 95 Kim, D. & Salzberg, S. L. TopHat-Fusion: an algorithm for discovery of novel fusion transcripts.  
770 *Genome biology* **12**, R72, doi:10.1186/gb-2011-12-8-r72 (2011).
- 771 96 Bignell, G. R. *et al.* Signatures of mutation and selection in the cancer genome. *Nature* **463**,  
772 893-898, doi:10.1038/nature08768 (2010).
- 773 97 Anders, S. & Huber, W. Differential expression analysis for sequence count data. *Genome biology*  
774 **11**, R106, doi:10.1186/gb-2010-11-10-r106 (2010).
- 775 98 Love, M. I., Huber, W. & Anders, S. Moderated estimation of fold change and dispersion for  
776 RNA-seq data with DESeq2. *Genome biology* **15**, 550, doi:10.1186/s13059-014-0550-8 (2014).
- 777 99 Peixoto, L. *et al.* How data analysis affects power, reproducibility and biological insight of  
778 RNA-seq studies in complex datasets. *Nucleic acids research* **43**, 7664-7674,  
779 doi:10.1093/nar/gkv736 (2015).
- 780 100 Stegle, O., Parts, L., Piipari, M., Winn, J. & Durbin, R. Using probabilistic estimation of  
781 expression residuals (PEER) to obtain increased power and interpretability of gene expression  
782 analyses. *Nat Protoc* **7**, 500-507, doi:10.1038/nprot.2011.457 (2012).
- 783 101 Wang, X. *et al.* Analysis of gene expression profiling in meningioma: deregulated signaling  
784 pathways associated with meningioma and EGFL6 overexpression in benign meningioma tissue  
785 and serum. *PLoS One* **7**, e52707, doi:10.1371/journal.pone.0052707 (2012).
- 786 102 Savvidis, C. & Koutsilieris, M. Circadian rhythm disruption in cancer biology. *Mol Med* **18**,  
787 1249-1260, doi:10.2119/molmed.2012.00077 (2012).
- 788 103 Sharma, S., Ray, S., Moiyadi, A., Sridhar, E. & Srivastava, S. Quantitative proteomic analysis of  
789 meningiomas for the identification of surrogate protein markers. *Sci Rep* **4**, 7140,  
790 doi:10.1038/srep07140 (2014).
- 791 104 Pfister, C., Tatabiga, M. S. & Roser, F. Selection of suitable reference genes for quantitative  
792 real-time polymerase chain reaction in human meningiomas and arachnoidea. *BMC Res Notes* **4**,  
793 275, doi:10.1186/1756-0500-4-275 (2011).
- 794 105 Luo, W., Friedman, M. S., Shedden, K., Hankenson, K. D. & Woolf, P. J. GAGE: generally  
795 applicable gene set enrichment for pathway analysis. *BMC Bioinformatics* **10**, 161,  
796 doi:10.1186/1471-2105-10-161 (2009).
- 797 106 Iorio, F. *et al.* Population-level characterization of pathway alterations with SLAPenrich dissects  
798 heterogeneity of cancer hallmark acquisition. *bioRxiv doi: 10.1101/077701* (2016).
- 799 107 Ben-Porath, I. *et al.* An embryonic stem cell-like gene expression signature in poorly differentiated  
800 aggressive human tumors. *Nat Genet* **40**, 499-507, doi:10.1038/ng.127 (2008).
- 801 108 Sarrio, D. *et al.* Epithelial-mesenchymal transition in breast cancer relates to the basal-like  
802 phenotype. *Cancer Res* **68**, 989-997, doi:10.1158/0008-5472.can-07-2017 (2008).
- 803 109 Wong, D. J. *et al.* Module map of stem cell genes guides creation of epithelial cancer stem cells.  
804 *Cell stem cell* **2**, 333-344, doi:10.1016/j.stem.2008.02.009 (2008).
- 805 110 The Gene Ontology Consortium. Gene Ontology Consortium: going forward. *Nucleic acids*  
806 *research* **43**, D1049-D1056, doi:10.1093/nar/gku1179 (2015).
- 807 111 R: A language and environment for statistical computing (R Foundation for Statistical Computing,  
808 Vienna, Austria, 2016).
- 809 112 Li, H. & Durbin, R. Fast and accurate short read alignment with Burrows-Wheeler transform.  
810 *Bioinformatics (Oxford, England)* **25**, 1754-1760, doi:10.1093/bioinformatics/btp324 (2009).
- 811 113 Ye, K., Schulz, M. H., Long, Q., Apweiler, R. & Ning, Z. Pindel: a pattern growth approach to  
812 detect break points of large deletions and medium sized insertions from paired-end short reads.  
813 *Bioinformatics (Oxford, England)* **25**, 2865-2871, doi:10.1093/bioinformatics/btp394 (2009).

814 114 Raine, K. M. *et al.* cgpPindel: Identifying Somatic Acquired Insertion and Deletion Events  
815 from Paired End Sequencing. *Current protocols in bioinformatics* **52**, 15.17.11-12,  
816 doi:10.1002/0471250953.bi1507s52 (2015).  
817 115 Nik-Zainal, S. *et al.* Landscape of somatic mutations in 560 breast cancer whole-genome  
818 sequences. *Nature* **534**, 47-54, doi:10.1038/nature17676 (2016).  
819 116 Raine, K. M. *et al.* ascatNgs: Identifying Somatic Acquired Copy-Number Alterations from  
820 Whole-Genome Sequencing Data. *Current protocols in bioinformatics* **56**, 15.19.11-15.19.17,  
821 doi:10.1002/cpbi.17 (2016).  
822 117 Sun, L., Craiu, R. V., Paterson, A. D. & Bull, S. B. Stratified false discovery control for large-scale  
823 hypothesis testing with application to genome-wide association studies. *Genet Epidemiol* **30**,  
824 519-530, doi:10.1002/gepi.20164 (2006).  
825 118 Buels, R. *et al.* JBrowse: a dynamic web platform for genome visualization and analysis. *Genome*  
826 *biology* **17**, 66, doi:10.1186/s13059-016-0924-1 (2016).  
827 119 Chang, M. T. *et al.* Identifying recurrent mutations in cancer reveals widespread lineage diversity  
828 and mutational specificity. *Nat Biotechnol* **34**, 155-163, doi:10.1038/nbt.3391 (2016).  
829 120 Subramanian, A. *et al.* Gene set enrichment analysis: a knowledge-based approach for interpreting  
830 genome-wide expression profiles. *Proc Natl Acad Sci U S A* **102**, 15545-15550,  
831 doi:10.1073/pnas.0506580102 (2005).  
832 121 Corver, W. E. *et al.* Genome haploidisation with chromosome 7 retention in oncocytic follicular  
833 thyroid carcinoma. *PloS one* **7**, e38287, doi:10.1371/journal.pone.0038287 (2012).  
834  
835

836 **Acknowledgements**

837 This work was supported by the Wellcome Trust, Cancer Research UK, Meningioma UK  
838 and Tadhg and Marie-Louise Flood. U.M. was personally supported by a Cancer Research  
839 UK Clinician Scientist Fellowship; G.C. by a Wellcome Trust Clinical PhD Fellowship  
840 (WT098051); F.M. by A.I.L. (Associazione Italiana Contro le Leucemie-Linfomi e Mieloma  
841 ONLUS) and by S.I.E.S. (Società Italiana di Ematologia Sperimentale); S.B. was funded  
842 by a Wellcome Trust Intermediate Clinical Research Fellowship and a St. Baldrick's  
843 Foundation Robert J. Arceci Innovation Award. J.B. was funded by the charity Brain  
844 Tumour Research. The samples were received from the tissue banks from Cambridge  
845 (UK), Dresden (Germany), Liverpool (UK), Plymouth (UK) and Tel Aviv (Israel). The  
846 Human Research Tissue Bank is supported by the NIHR Cambridge Biomedical Research  
847 Centre. We are grateful to the patients who enabled this study and to the clinical teams  
848 coordinating their care.

849

850 **Author Contributions**

851 G.C. and N.K. performed mRNA expression analysis. P.T. and G.C. analysed whole  
852 genome and targeted sequencing data. I.M. performed statistical analyses to detect novel  
853 driver mutations. S.M. analysed methylation array data. F.M. generated mutational  
854 signatures analysis. J.T. and M.C. performed retrotransposon analysis. C.O.H. and J.D.  
855 performed protein expression analysis. A.B, S.B. and M.Y. contributed to data analysis  
856 strategy. A.Y., T.N., G.R.B and J.T. provided informatic support. T.S., R.W.K., M.K, G.S.,  
857 D.P., A.D., C.E.M., A.Y., I.N., S.J.P., C.W., Z.R., M.D.J., R.Z., and K. S. provided samples  
858 and clinical data. S.B., G.S.V, I.N. and M.W.M. provided conceptual advice. V.P.C and  
859 K.A. carried out central pathology review. U.M. and T.S. devised and supervised the  
860 project. U.M. G.C. and T.S. wrote the manuscript with input from S.B., P.T., and G.S.V. All  
861 authors approved the manuscript.

862

863 **Competing Financial Interests:** All authors declare no competing financial interests.

864

865 Correspondence and requests for materials should be addressed to U.M.

866 ([um1@sanger.ac.uk](mailto:um1@sanger.ac.uk)) and T.S. ([ts381@cam.ac.uk](mailto:ts381@cam.ac.uk))



# Figure 1

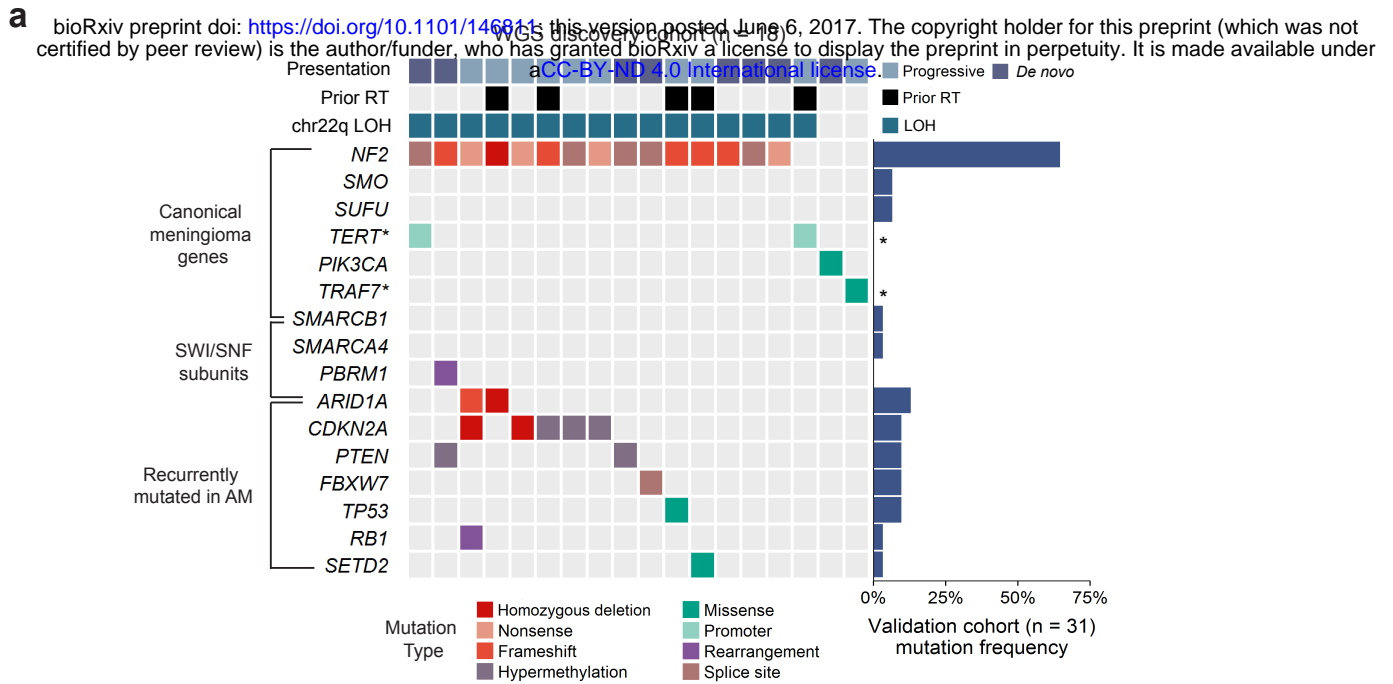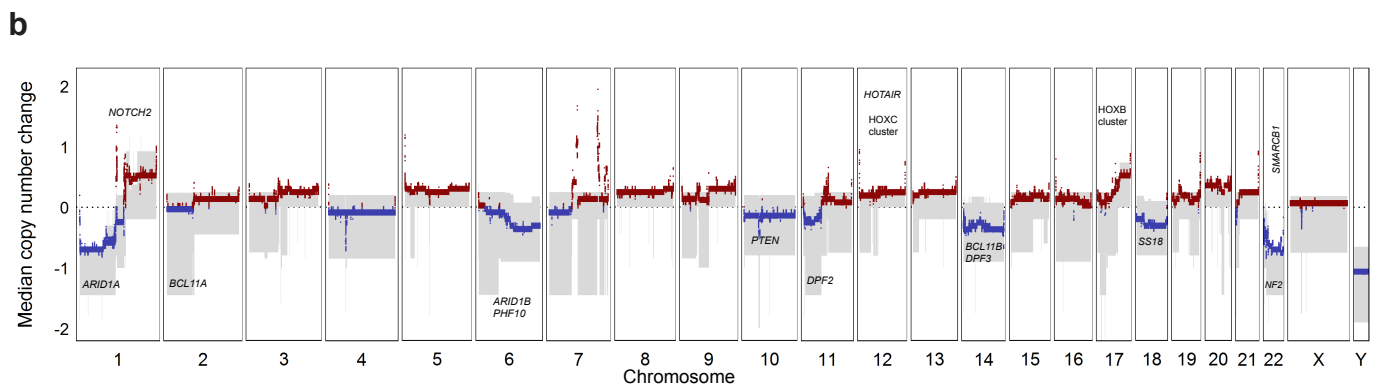

**Figure 1 | The landscape of driver mutations and copy number alterations in anaplastic meningioma. (a)** The landscape of somatic driver variants in primary anaplastic meningioma. Somatic mutation and promoter methylation data is shown for a discovery cohort of 18 primary tumours characterised by whole genome sequencing. Mutations in recurrently altered genes, established meningioma genes and SWI/SNF complex subunits are included. Samples are annotated for chromosome 22q LOH, prior radiotherapy exposure, and clinical presentation (*de novo* versus progression from a lower grade meningioma). The bar chart to the right indicates mutation frequency in a validation cohort of 31 primary tumors sequenced with a 366 cancer gene panel. Asterisks indicate genes not included in the targeted sequencing assay. **(b)** Aggregate copy number profile of primary anaplastic meningioma. For the 18 tumors characterised by whole genome sequencing, the median relative copy number change was calculated across the genome in 10 kilobase segments, adjusting for ploidy. The grey shaded area indicates the first and third quartile of copy number for each genomic segment. The solid red and blue lines represent the median relative copy number gain and loss, respectively, with zero indicating no copy number change. X-axis: Chromosomal position. Y-axis: median relative copy number change. Potential target genes are noted. AM, anaplastic meningioma; LOH, loss of heterozygosity; RT, radiotherapy.

## Figure 2

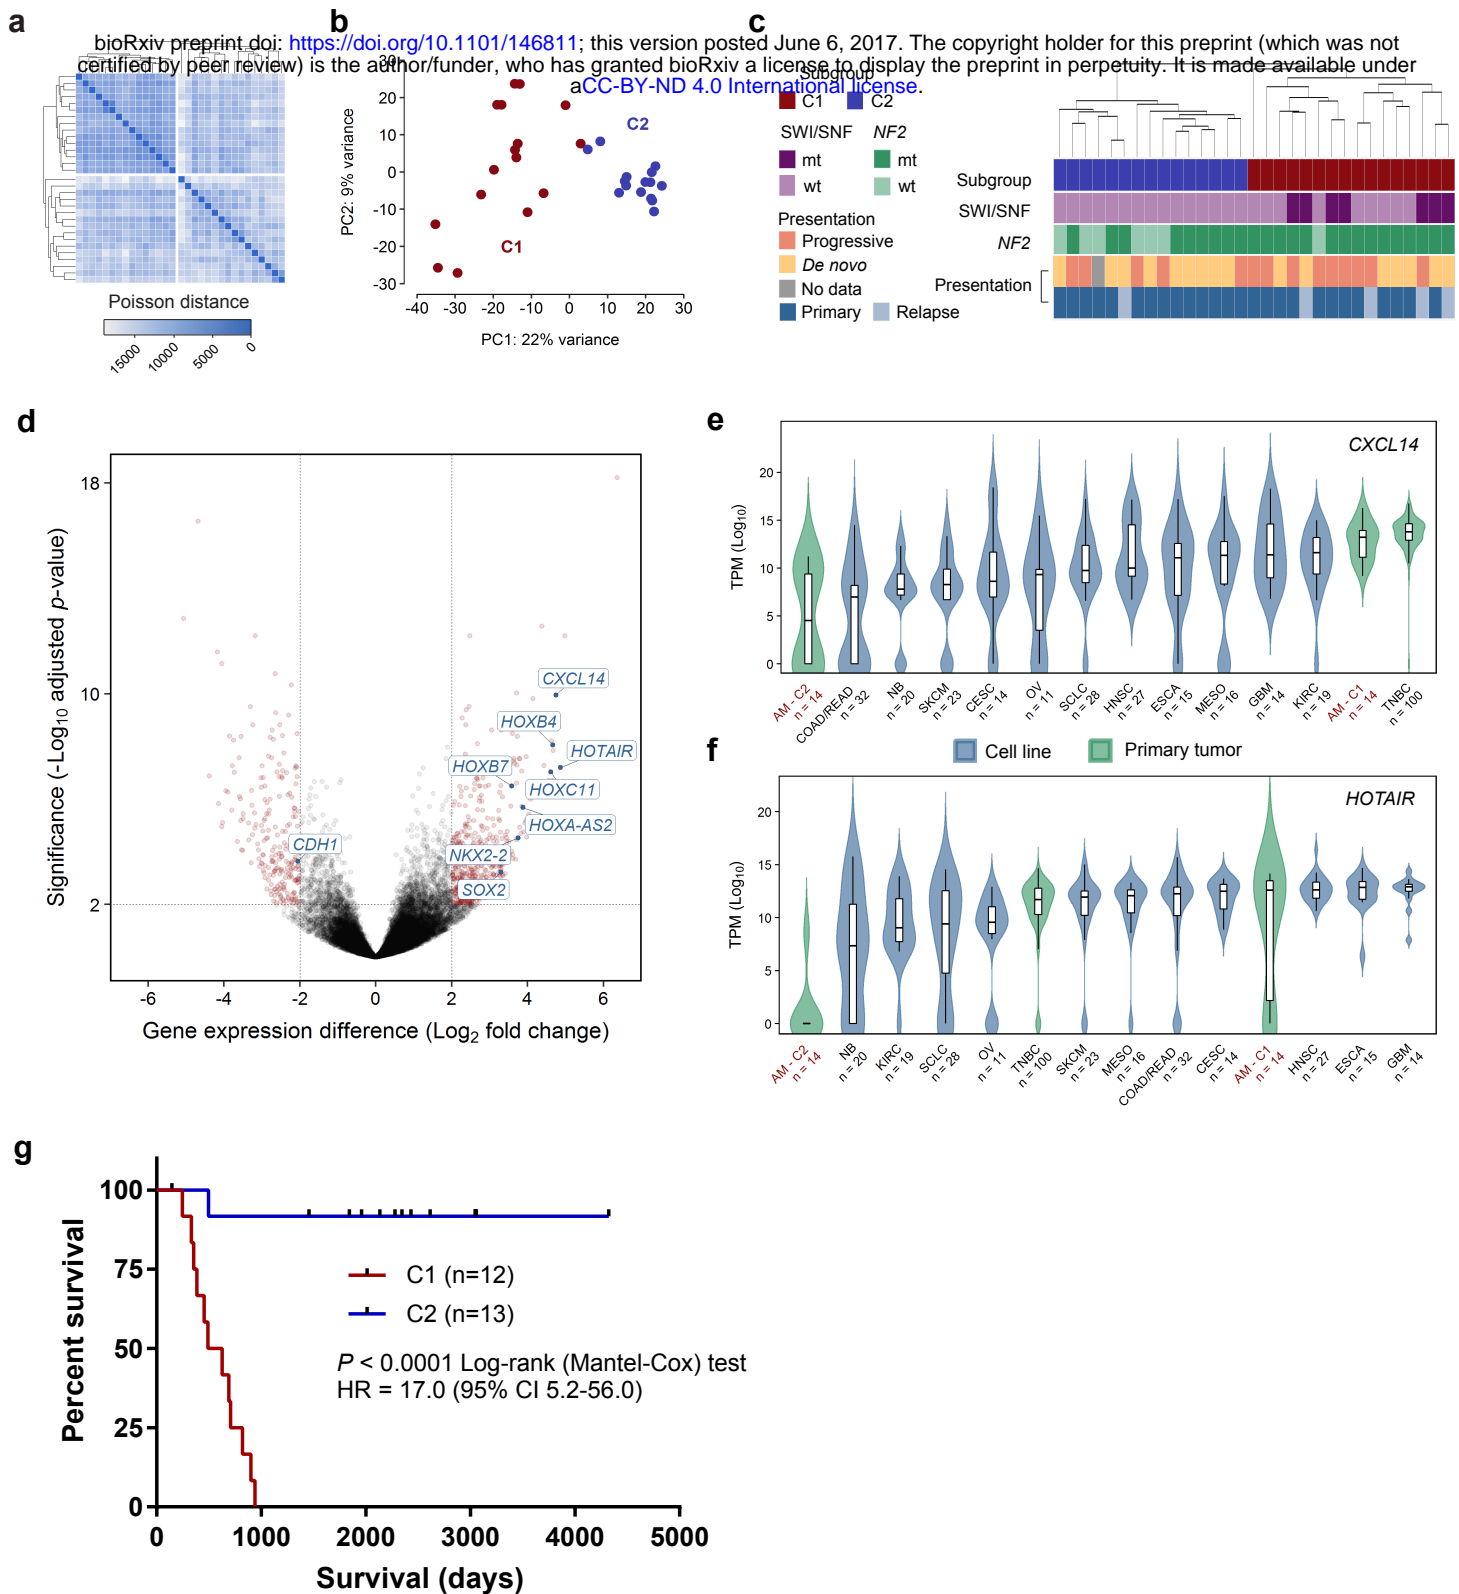

**Figure 2 | Transcriptomic classification of anaplastic meningioma.** (a) Unsupervised hierarchical clustering and (b) Principal component analysis of anaplastic meningioma gene expression revealed two subgroups (denoted C1 and C2). (c) Dendrogram obtained by unsupervised clustering annotated with clinical and genomic features. (d) Volcano plot depicting genes differentially expressed between C1 versus C2 anaplastic meningioma samples. The horizontal axis shows the  $\log_2$  fold change and the vertical axis indicates the  $-\log_{10}$  adjusted  $p$ -value. Genes with an adjusted  $p$ -value  $< 0.01$  and absolute  $\log_2$  fold change  $> 2$  are highlighted in red with particular genes of interest indicated. (e, f) Box plots of (e) CXCL14 and (f) HOTAIR expression across 31 anaplastic meningiomas classified into C1 and C2 subgroups, 100 primary breast tumors, and 219 cancer cell lines from 11 tumor types. Upper and lower box hinges correspond to first and third quartiles, horizontal line and whiskers indicate the median and 1.5-fold the interquartile range, respectively. Underlying violin plots show data distribution and are color-coded according to specimen source (blue, cell line; green, primary tumor). X-axis indicates tumor type and number of samples in cohort. Y-axis shows NF2  $\log_{10}$  TPM values. (g) Kaplan-Meier curves showing overall survival for 25 (of 28) anaplastic meningioma patients in C1 and C2 subgroups for whom follow-up data was available. Dashes indicate timepoints at which subjects were censored at time of last follow-up. TPM, transcripts per kilobase million; AM, anaplastic meningioma; TNBC, triple negative breast carcinoma; wt, wild-type; mt, mutated; HR, hazard ratio; CI, confidence interval; PC, principal component.



### Figure 3

bioRxiv preprint doi: <https://doi.org/10.1101/146811>; this version posted June 6, 2017. The copyright holder for this preprint (which was not certified by peer review) is the author/funder, who has granted bioRxiv a license to display the preprint in perpetuity. It is made available under aCC-BY-ND 4.0 International license.

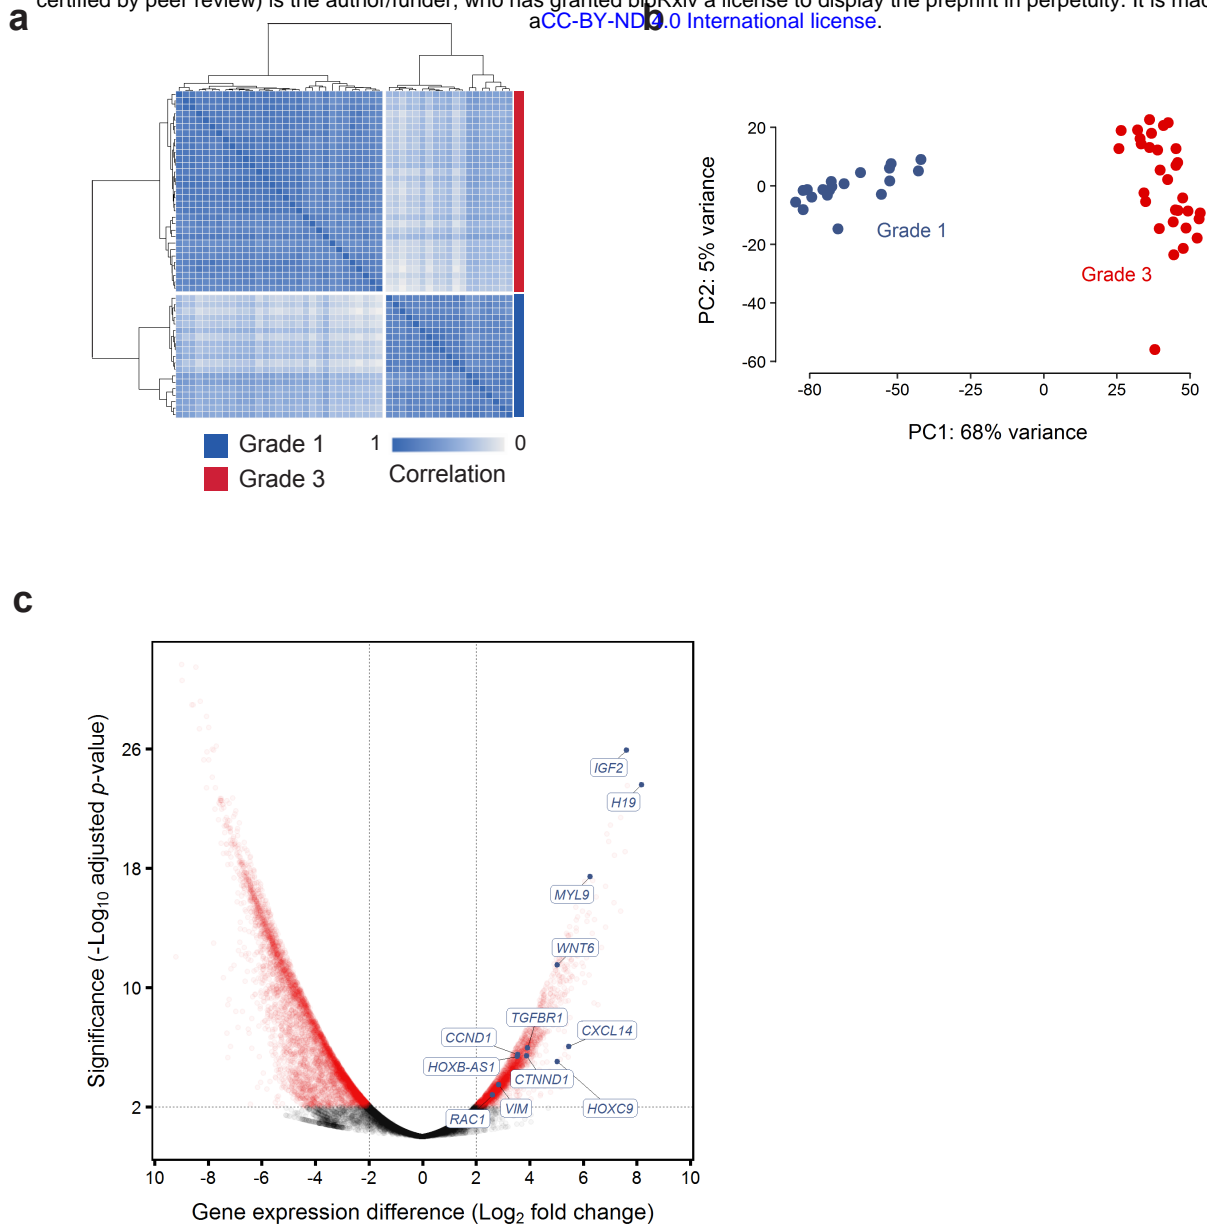

**Figure 3 | Differences in gene expression profile between grade 1 and anaplastic meningiomas.** (a, b) Normalised transcript counts from grade 1 and anaplastic meningioma samples clustered by (a) Pearson's correlation coefficient and (b) principal component analysis. (c) Volcano plot illustrating differences in gene expression between anaplastic versus grade 1 meningiomas with selected genes indicated. The horizontal axis shows the  $\log_2$  fold change and the vertical axis indicates the  $-\log_{10}$  adjusted  $p$ -value. Genes with an adjusted  $p$ -value  $< 0.01$  and absolute  $\log_2$  fold change  $> 2$  are highlighted in red. PC, principal component.
